# Supplementary material
Source: publisher figshare collection journal article supplement (https://sage.figshare.com/ndownloader/files/22692494)
Supplement: Supplementary file 1 [file 22692494]

## Observation Chart Audit

1. Site:

2. Patients admitting diagnosis:

3. ETT or Tracheostomy

- ☐ ETT
- ☐ Tracheostomy

4. Relevant underlying co-morbidities:

| COPD                     | Asthma                   | Smoker                   | Stroke                   | CCF                      | APO                      | PE                       |
|--------------------------|--------------------------|--------------------------|--------------------------|--------------------------|--------------------------|--------------------------|
| <input type="checkbox"/> |

Other (please specify)

5. Infection screen

|                                                |                      |
|------------------------------------------------|----------------------|
| Does the patient have a respiratory infection? | <input type="text"/> |
| Is the origin of infection known?              | <input type="text"/> |
| Is the patient treated with antibiotics?       | <input type="text"/> |

Name of Organism, sensitivities and antibiotics used:

6. Number of days in ICU:

7. Frequency of suctioning documented on chart:

8. Comments made on chart regarding sputum (appearance/ amounts/ viscosity):

9. Kinetic bed used?

☐ Yes

☐ No

☐ Other (please specify)

10. Does the nurse document the frequency of patient turns?

☐ Yes

☐ No

☐ If so how often is this done?

11. Is the patient prescribed a PPI?

☐ Yes

☐ No

☐ Which PPI used?

12. Does the nurse document the frequency of provided mouth care ?

☐ Yes

☐ No

☐ Other (please specify)

13. How often were blood gases taken within 12hour period?

14. Are there comments made on chart/ in notes regarding CXR changes?
